# Supplementary material for: Volumetric Evaluation of the Entire Papilla Preservation Technique and the Non-Incised Papillae Surgical Approach: Effects on Soft Tissue Preservation and Periodontal Regeneration
Source: Research Square preprint supplement (doi:10.21203/rs.3.rs-7171416/v1), 2025-08-06
Supplement: Supplementary file 1 [file 6d1c56b346b398bf05b1d226.docx]

**SUPPLEMENT**

## **Enrollment**

Assessed for eligibility (n = 112)

Randomized (n = 40)

## **Allocation**

Excluded (n = 72)

- Not meeting inclusion criteria (n = 61)
- Declined to participate (n = 5)
- Other reasons (n = 6)

Allocated to intervention (n = 20)

- Received allocated intervention (EPPT) (n = 20)
- Did not receive allocated intervention (n = 0)

Allocated to intervention (n = 20)

- Received allocated intervention (NIPSA) (n = 20)
- Did not receive allocated intervention (n = 0)

¸

Analysed (n = 20)
Excluded from analysis (n = 0)

Analysed (n = 20)

Excluded from analysis (n = 0)

**Analysis**

**Follow-up**

Lost to follow-up (n = 0)

Discontinued intervention (n = 0)

Lost to follow-up (n = 0)

Discontinued intervention (n = 0)

Supplement Figure 1: CONSORT flow diagram.

Clinical Oral Investigation

Volumetric Evaluation of the Entire Papilla Preservation Technique and the Non-Incised Papillae Surgical Approach: Effects on Soft Tissue Preservation and Periodontal Regeneration

Tom Kobe1, Katja Povšič2,3, Rok Gašperšič2,3

1 Private practice, Ljubljana, Slovenia

2 Department of Oral Medicine and Periodontology, University Medical Centre Ljubljana, Slovenia

3 Department of Oral Medicine and Periodontology, Faculty of Medicine, University of Ljubljana, Slovenia

Corresponding author: Tom Kobe, tom.kobe@gmail.com
